# Supplementary material for: Thermo-responsive ABA triblock copolymer of PVEA-b-PNIPAM-b-PVEA showing solvent-tunable LCST in a methanol–water mixture
Source: Royal Society of Chemistry journal article supplement (doi:10.1039/c3py01219k), 2013-10-11
Supplement: c3py01219k.pdf [file c3py01219k.pdf]

## Supporting Information for:

### Thermo-responsive ABA triblock copolymer of PVEA-*b*-PNIPAM-*b*-PVEA

showing double LCST in the methanol/water mixture

Shentong Li, Yang Su, Meihan Dan, and Wangqing Zhang\*

Key Laboratory of Functional Polymer Materials of the Ministry of Education,  
Institute of Polymer Chemistry, Nankai University, Tianjin 300071, China.

\* To whom correspondence should be addressed. E-mail: wqzhang@nankai.edu.cn,

Tel: 86-22-23509794, Fax: 86-22-23503510.

#### 1. The $^1\text{H}$ NMR spectrum of VEA

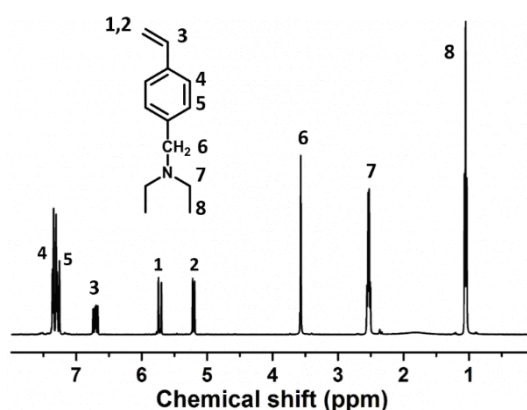

Figure S1. The  $^1\text{H}$  NMR spectrum of VEA

#### 2. Synthesis and characterization of PNIPAM<sub>183</sub> by RAFT polymerization

Into a Schlenk flask, NIPAM (1.3584 g, 12.0 mmol), BDMAT (0.0171 g, 0.060 mmol), AIBN (3.28 mg, 0.02 mmol), and 1,4-dioxane (2.8 mL) were added. The solution was initially degassed with nitrogen at 0 °C for 30 min, and then the flask content was immersed into a preheated oil bath at 70 °C. After 100 min, the reaction was quenched by cooling to 0 °C, an aliquot was withdrawn to determine the

monomer conversion by  $^1\text{H}$  NMR analysis. The NIPAM monomer conversion was calculated according to eq 2. The synthesized polymer was precipitated into cold diethyl ether and dried at room temperature under vacuum.

The  $^1\text{H}$  NMR spectrum and GPC traces of the synthesized PNIPAM<sub>183</sub> are shown in Figure S2 and S3, respectively.

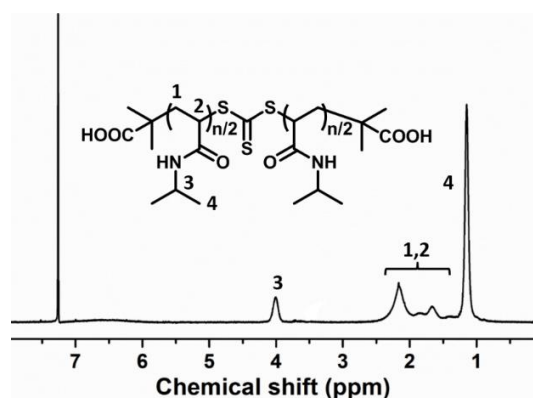

**Figure S2.** The  $^1\text{H}$  NMR spectrum of PNIPAM<sub>183</sub>.

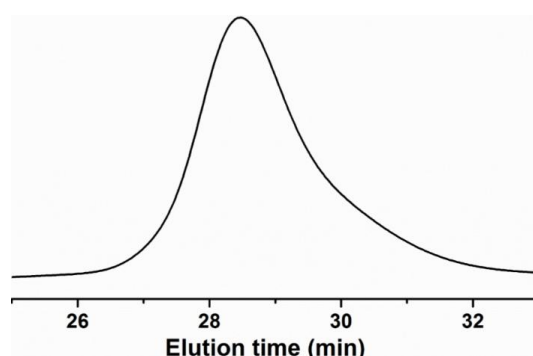

**Figure S3.** The GPC traces of PNIPAM<sub>183</sub>.

### 3. Solubility of PVEA<sub>40</sub> in the methanol/water mixture

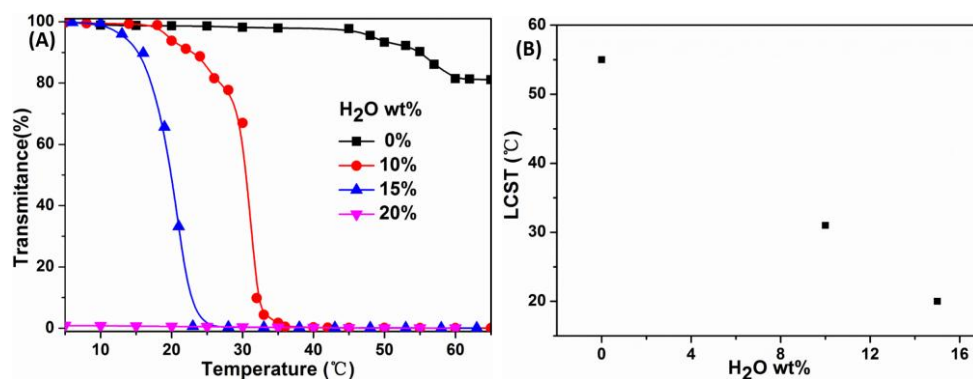

**Figure S4.** Transmittance versus temperature plots (A) and the water content dependent LCST of PVEA<sub>40</sub> (B) in the methanol/water mixture. The polymer concentration is 1.0 wt%.

#### 4. Solubility of PNIPAM<sub>183</sub> in the methanol/water mixture

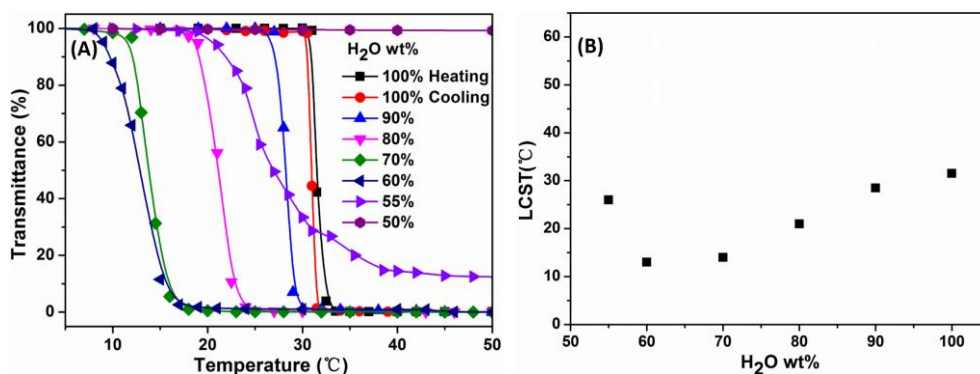

**Figure S5.** Transmittance versus temperature plots (A) and the water content dependent LCST of PNIPAM<sub>183</sub> (B) in the methanol/water mixture. The polymer concentration is 0.1 wt%.

#### 5. Dilution of the PVEA<sub>32</sub>-*b*-PNIPAM<sub>190</sub>-*b*-PVEA<sub>32</sub> micellar dispersion

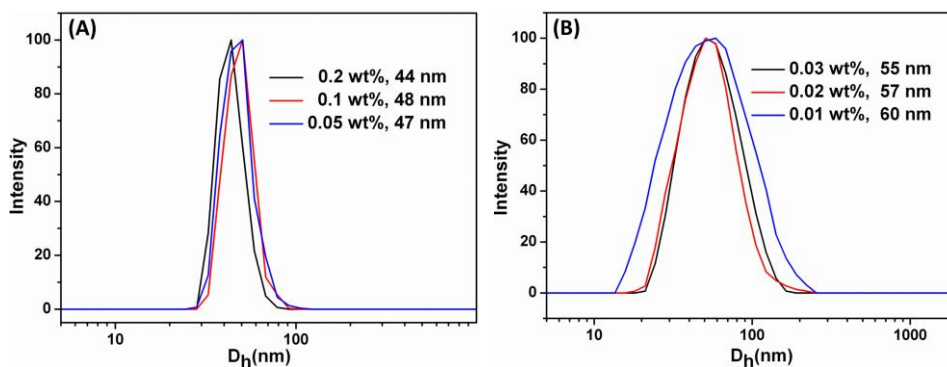

**Figure S6.** The intensity-weighted hydrodynamic diameter ( $D_h$ ) distribution of the V<sub>32</sub>N<sub>190</sub>V<sub>32</sub> triblock copolymer (A) in the 80/20 methanol/water mixture at 50 °C and (B) in water at 20 °C.

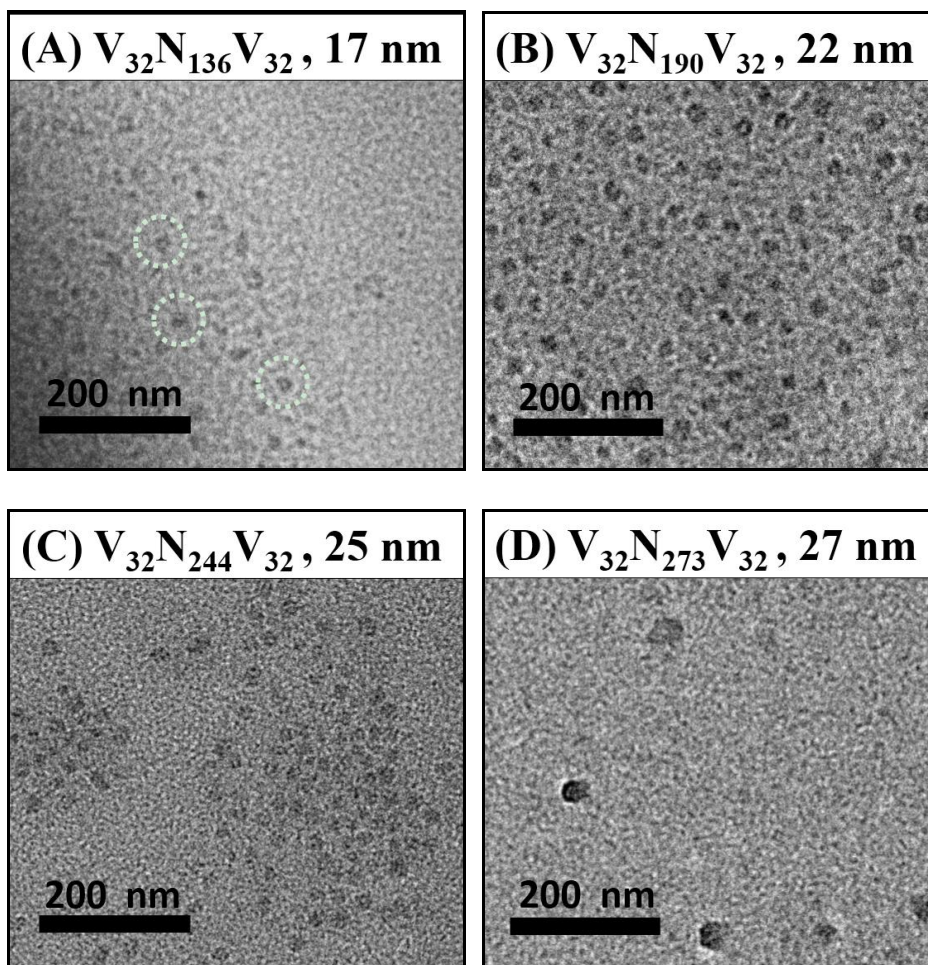

**Figure S7.** TEM images of the triblock copolymer micelles of  $V_{32}N_{136}V_{32}$  (A),  $V_{32}N_{190}V_{32}$  (B),  $V_{32}N_{244}V_{32}$  (C) and  $V_{32}N_{273}V_{32}$  (D) in water at temperature (20 °C) below the LCST of the looped PNIPAM corona.
